# Supplementary material
Source: MDPI journal article supplement (https://www.mdpi.com/2073-4441/14/17/2651)
Supplement: s1 [file s1]

## Supplementary Materials

# Simultaneous Removal of COD<sub>Mn</sub> and Ammonium from Water by Potassium Ferrate-Enhanced Iron-Manganese Co-Oxide Film

Yingming Guo <sup>1,\*</sup>, Ben Ma <sup>1</sup>, Shengchen Yuan <sup>1</sup>, Yuhong Zhang <sup>1</sup>, Jing Yang <sup>1</sup>, Ruifeng Zhang <sup>1</sup> and Longlong Liu <sup>2</sup>

- <sup>1</sup> School of Urban Planning and Municipal Engineering, Xi'an Polytechnic University, Xi'an 710048, China; mbdyyds@126.com (B.M.); 18502379634@163.com (S.Y.); zyh1134972793@163.com (Y.Z.); jingy76@163.com (J.Y.); ruifengzhangtry@xpu.edu.cn (R.Z.)  
<sup>2</sup> Shaanxi LangMingRun Environmental Protection Technology Co., Xi'an 710061, China; liuxianlong1411@126.com  
\* Correspondence: guoyingming@xpu.edu.cn

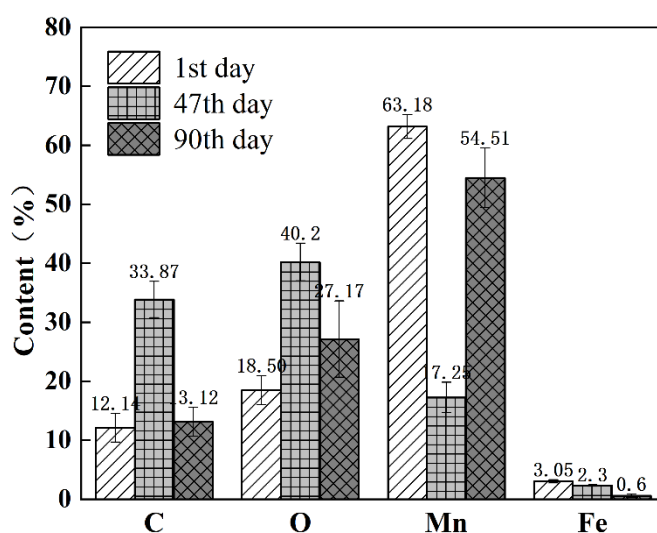

**Figure S1.** The elemental composition of the filter film at different experimental stages
